# Supplementary material for: Comparison of stool samples and rectal swabs with and without pre-enrichment for the detection of third-generation cephalosporin-resistant Enterobacterales (3GCREB)
Source: Springer Nature journal article supplement (doi:10.1007/s10096-021-04250-1), 2021-04-27
Supplement: MOESM1 [file 19110254]

## Comparison of stool samples and rectal swabs with and without pre-enrichment for the detection of third-generation cephalosporin-resistant *Enterobacteriales* (3GCREB)

European Journal of Clinical Microbiology & Infectious Diseases

Tarek Jazmati<sup>a,b</sup>, Axel Hamprecht<sup>a,b,d</sup>, Nathalie Jazmati<sup>a,b,c,#</sup>

<sup>a</sup>Institute for Medical Microbiology, Immunology and Hygiene, University of Cologne, Cologne, Germany; <sup>b</sup>German Centre for Infection Research (DZIF), partner site Bonn-Cologne, Germany; <sup>c</sup>Laboratory Dr. Wisplinghoff, Cologne, Germany; <sup>d</sup>Institute for Medical Microbiology and Virology, University of Oldenburg & Klinikum Oldenburg, Oldenburg, Germany

<sup>#</sup>Corresponding author: nathalie.jazmati@uk-koeln.de

### Online Resource 1 Drug susceptibilities of 3GCREB isolates recovered by the four approaches and compared to each other

| Strain characteristics           | 3GCREB isolates recovered by   |                                |                         |                                         |                                |                         |                                      |                                |                         |                                               |                                |                         |                                            |                                |                         |
|----------------------------------|--------------------------------|--------------------------------|-------------------------|-----------------------------------------|--------------------------------|-------------------------|--------------------------------------|--------------------------------|-------------------------|-----------------------------------------------|--------------------------------|-------------------------|--------------------------------------------|--------------------------------|-------------------------|
|                                  | Overall (n=97)                 |                                |                         | Stool without pre-enrichment (A) (n=68) |                                |                         | Stool with pre-enrichment (B) (n=81) |                                |                         | Rectal swab without pre-enrichment (C) (n=63) |                                |                         | Rectal swab with pre-enrichment (D) (n=75) |                                |                         |
| Drug Susceptibility <sup>a</sup> | MIC <sub>50</sub> <sup>a</sup> | MIC <sub>90</sub> <sup>a</sup> | I/R <sup>a</sup> (n, %) | MIC <sub>50</sub> <sup>a</sup>          | MIC <sub>90</sub> <sup>a</sup> | I/R <sup>a</sup> (n, %) | MIC <sub>50</sub> <sup>a</sup>       | MIC <sub>90</sub> <sup>a</sup> | I/R <sup>a</sup> (n, %) | MIC <sub>50</sub> <sup>a</sup>                | MIC <sub>90</sub> <sup>a</sup> | I/R <sup>a</sup> (n, %) | MIC <sub>50</sub> <sup>a</sup>             | MIC <sub>90</sub> <sup>a</sup> | I/R <sup>a</sup> (n, %) |
| Piperacillin/Tazobactam          | 64                             | >128                           | 60 (61.9%)              | 16                                      | >128                           | 36 (52.9%)              | 32                                   | >128                           | 46 (56.8%)              | 16                                            | >128                           | 33 (52.4%)              | 64                                         | >128                           | 46 (61.3%)              |
| Cefpodoxime                      | >8                             | >8                             | 97 (100%)               | >8                                      | >8                             | 68 (100%)               | >8                                   | >8                             | 81 (100%)               | >8                                            | >8                             | 63 (100%)               | >8                                         | >8                             | 75 (100%)               |
| Cefotaxime                       | >64                            | >64                            | 92 (94.8%)              | >64                                     | >64                            | 66 (97.1%)              | >64                                  | >64                            | 77 (95.1%)              | >64                                           | >64                            | 62 (98.4%)              | >64                                        | >64                            | 73 (97.3%)              |
| Ceftazidime                      | 16                             | >64                            | 76 (78.4%)              | 16                                      | >64                            | 53 (77.9%)              | 16                                   | >64                            | 65 (80.2%)              | 16                                            | >64                            | 49 (77.8%)              | 16                                         | >64                            | 59 (78.7%)              |
| Ertapenem                        | <0.5                           | 2                              | 15 (15.5%)              | <0.5                                    | 1                              | 9 (13.2%)               | <0.5                                 | 2                              | 14 (17.3%)              | <0.5                                          | 1                              | 10 (15.9%)              | <0.5                                       | 1                              | 11 (14.7%)              |
| Imipenem                         | <0.25                          | 1                              | 4 (4.1%)                | <0.25                                   | 1                              | 3 (4.4%)                | <0.25                                | 1                              | 4 (4.9%)                | <0.25                                         | 0.5                            | 3 (4.8%)                | <0.25                                      | 1                              | 3 (4.0%)                |
| Meropenem                        | <0.25                          | <0.25                          | 2 (2.1%)                | <0.25                                   | <0.25                          | 1 (1.5%)                | <0.25                                | <0.25                          | 2 (2.5%)                | <0.25                                         | <0.25                          | 1 (1.6%)                | <0.25                                      | <0.25                          | 1 (1.3%)                |
| Ciprofloxacin                    | <0.25                          | >4                             | 38 (39.2%)              | <0.25                                   | >4                             | 30 (44.1%)              | <0.25                                | >4                             | 33 (40.7%)              | <0.25                                         | >4                             | 25 (39.7%)              | <0.25                                      | >4                             | 29 (38.7%)              |
| Trimethoprim/Sulfamethoxazole    | <20                            | >320                           | 43 (44.3%)              | >320                                    | >320                           | 35 (51.5%)              | <20                                  | >320                           | 38 (46.9%)              | <20                                           | >320                           | 30 (47.6%)              | <20                                        | >320                           | 34 (45.3%)              |

<sup>a</sup> MIC<sub>50</sub>/MIC<sub>90</sub> estimates the antibiotic concentration (mg/liter) that inhibits 50% (MIC<sub>50</sub>) and 90% (MIC<sub>90</sub>) of tested bacterial isolates; I/R, number of isolates considered to be intermediate (I) or resistant (R) to the indicated antimicrobial agent according to EUCAST clinical MIC breakpoints.

\* p-value was obtained using  $\chi^2$  test and accounts for the comparison of 3GCREB isolates recovered by the four approaches.

3GCREB, third-generation cephalosporin-resistant *Enterobacteriales*

# Comparison of stool samples and rectal swabs with and without pre-enrichment for the detection of third-generation cephalosporin-resistant *Enterobacteriales* (3GCREB)

European Journal of Clinical Microbiology & Infectious Diseases

Tarek Jazmati<sup>a,b</sup>, Axel Hamprecht<sup>a,b,d</sup>, Nathalie Jazmati<sup>a,b,c,#</sup>

<sup>a</sup>Institute for Medical Microbiology, Immunology and Hygiene, University of Cologne, Cologne, Germany; <sup>b</sup>German Centre for Infection Research (DZIF), partner site Bonn-Cologne, Germany; <sup>c</sup>Laboratory Dr. Wisplinghoff, Cologne, Germany; <sup>d</sup>Institute for Medical Microbiology and Virology, University of Oldenburg & Klinikum Oldenburg, Oldenburg, Germany

<sup>#</sup>Corresponding author: nathalie.jazmati@uk-koeln.de

## Online Resource 2 Strain characteristics of ESBL-E isolates recovered by the four approaches and compared to each other

| Strain characteristics                   | Overall (n=54) | ESBL-E isolates recovered by            |            |       |                                      |            |       |                                               |            |       |                                            |            |       |       |            |
|------------------------------------------|----------------|-----------------------------------------|------------|-------|--------------------------------------|------------|-------|-----------------------------------------------|------------|-------|--------------------------------------------|------------|-------|-------|------------|
|                                          |                | Stool without pre-enrichment (A) (n=47) |            |       | Stool with pre-enrichment (B) (n=49) |            |       | Rectal swab without pre-enrichment (C) (n=43) |            |       | Rectal swab with pre-enrichment (D) (n=44) |            |       |       |            |
| <b>Species</b>                           |                |                                         |            |       |                                      |            |       |                                               |            |       |                                            |            |       |       |            |
| <i>Escherichia coli</i>                  | 45 (83.3%)     | 42 (89.4%)                              |            |       | 41 (83.7%)                           |            |       | 37 (86.0%)                                    |            |       | 37 (84.1%)                                 |            |       |       |            |
| <i>Klebsiella pneumoniae</i>             | 3 (5.6%)       | 3 (6.4%)                                |            |       | 3 (6.1%)                             |            |       | 2 (4.7%)                                      |            |       | 2 (4.5%)                                   |            |       |       |            |
| <i>Klebsiella aerogenes</i>              | 2 (3.7%)       | 0                                       |            |       | 2 (4.1%)                             |            |       | 1 (2.3%)                                      |            |       | 1 (2.3%)                                   |            |       |       |            |
| <i>Enterobacter cloacae</i>              | 3 (5.6%)       | 2 (4.3%)                                |            |       | 3 (6.1%)                             |            |       | 3 (7.0%)                                      |            |       | 3 (6.8%)                                   |            |       |       |            |
| <i>Citrobacter farmeri</i>               | 1 (1.9%)       | 0                                       |            |       | 0                                    |            |       | 0                                             |            |       | 1 (2.3%)                                   |            |       |       |            |
| <b>ESBL genes</b>                        |                |                                         |            |       |                                      |            |       |                                               |            |       |                                            |            |       |       |            |
| CTX-M-1 (no. (% of ESBL))                | 33 (61.1%)     | 30 (63.8%)                              |            |       | 31 (63.3%)                           |            |       | 29 (67.4%)                                    |            |       | 28 (63.6%)                                 |            |       |       |            |
| CTX-M-9 (no. (% of ESBL))                | 9 (16.7%)      | 7 (14.9%)                               |            |       | 8 (16.3%)                            |            |       | 6 (14.0%)                                     |            |       | 8 (18.2%)                                  |            |       |       |            |
| Unknown (no. (% of ESBL))                | 12 (22.2%)     | 10 (21.3%)                              |            |       | 10 (20.4%)                           |            |       | 8 (18.6%)                                     |            |       | 8 (18.2%)                                  |            |       |       |            |
| <b>Drug Susceptibilities<sup>a</sup></b> |                |                                         |            |       |                                      |            |       |                                               |            |       |                                            |            |       |       |            |
|                                          | MIC50          | MIC90                                   | I/R (n, %) | MIC50 | MIC90                                | I/R (n, %) | MIC50 | MIC90                                         | I/R (n, %) | MIC50 | MIC90                                      | I/R (n, %) | MIC50 | MIC90 | I/R (n, %) |
| Piperacillin/Tazobactam                  | 8              | >128                                    | 19 (35.2%) | 8     | >128                                 | 16 (34.0%) | 8     | >128                                          | 16 (32.7%) | 8     | >128                                       | 14 (32.6%) | 8     | >128  | 16 (36.4%) |
| Cefpodoxime                              | >8             | >8                                      | 54 (100%)  | >8    | >8                                   | 47 (100%)  | >8    | >8                                            | 49 (100%)  | >8    | >8                                         | 43 (100%)  | >8    | >8    | 44 (100%)  |
| Cefotaxime                               | >64            | >64                                     | 53 (98.1%) | >64   | >64                                  | 46 (97.9%) | >64   | >64                                           | 48 (98.0%) | >64   | >64                                        | 42 (97.7%) | >64   | >64   | 44 (100%)  |
| Ceftazidime                              | 8              | >64                                     | 37 (68.5%) | 8     | >64                                  | 32 (68.1%) | 8     | >64                                           | 35 (71.4%) | 8     | >64                                        | 30 (69.8%) | 8     | >64   | 30 (68.2%) |
| Ertapenem                                | <0.5           | <0.5                                    | 2 (3.7%)   | <0.5  | <0.5                                 | 2 (4.3%)   | <0.5  | <0.5                                          | 2 (4.1%)   | <0.5  | <0.5                                       | 2 (4.7%)   | <0.5  | <0.5  | 2 (4.5%)   |
| Imipenem                                 | <0.25          | <0.25                                   | 0          | <0.25 | <0.25                                | 0          | <0.25 | <0.25                                         | 0          | <0.25 | 0.5                                        | 0          | <0.25 | 0.5   | 0          |
| Meropenem                                | <0.25          | <0.25                                   | 0          | <0.25 | <0.25                                | 0          | <0.25 | <0.25                                         | 0          | <0.25 | <0.25                                      | 0          | <0.25 | <0.25 | 0          |
| Ciprofloxacin                            | >4             | >4                                      | 32 (59.3%) | >4    | >4                                   | 28 (59.6%) | >4    | >4                                            | 28 (57.1%) | 2     | >4                                         | 23 (53.5%) | >4    | >4    | 26 (59.1%) |
| Trimethoprim/Sulfamethoxazole            | >320           | >320                                    | 37 (68.5%) | >320  | >320                                 | 33 (70.2%) | >320  | >320                                          | 33 (67.3%) | >320  | >320                                       | 29 (67.4%) | >320  | >320  | 32 (72.7%) |

<sup>a</sup> MIC<sub>50</sub>/MIC<sub>90</sub> estimates the antibiotic concentration (mg/l) that inhibits 50% (MIC<sub>50</sub>) and 90% (MIC<sub>90</sub>) of tested bacterial isolates; I/R, number of isolates considered to be intermediate (I) or resistant (R) to the indicated antimicrobial agent according to EUCAST clinical MIC breakpoints.

ESBL-E, extended-spectrum-beta-lactamase-producing *Enterobacteriales*

## Comparison of stool samples and rectal swabs with and without pre-enrichment for the detection of third-generation cephalosporin-resistant *Enterobacteriales* (3GCREB)

### European Journal of Clinical Microbiology & Infectious Diseases

Tarek Jazmati<sup>a,b</sup>, Axel Hamprecht<sup>a,b,d</sup>, Nathalie Jazmati<sup>a,b,c,#</sup>

<sup>a</sup>Institute for Medical Microbiology, Immunology and Hygiene, University of Cologne, Cologne, Germany; <sup>b</sup>German Centre for Infection Research (DZIF), partner site Bonn-Cologne, Germany; <sup>c</sup>Laboratory Dr. Wisplinghoff, Cologne, Germany; <sup>d</sup>Institute for Medical Microbiology and Virology, University of Oldenburg & Klinikum Oldenburg, Oldenburg, Germany

<sup>#</sup>Corresponding author: nathalie.jazmati@uk-koeln.de

### Online Resource 3 Distribution of identified species and resistance mechanisms among the 97 3GCREB study isolates

|                                | ESBL (n (%))                 |                             |                              |                              | Other resistance mechanism (n(%)) |                            |                                 |                                 |                            | Total (n (%)) <sup>4</sup> |
|--------------------------------|------------------------------|-----------------------------|------------------------------|------------------------------|-----------------------------------|----------------------------|---------------------------------|---------------------------------|----------------------------|----------------------------|
|                                | CTX-M-1 group <sup>2</sup>   | CTX-M-9 group <sup>2</sup>  | unknwon ESBL <sup>2</sup>    | Total ESBL <sup>1</sup>      | AmpC <sup>1</sup>                 | Hyper K1 <sup>1</sup>      | bla <sub>IMP</sub> <sup>1</sup> | bla <sub>VIM</sub> <sup>1</sup> | SHV <sup>1</sup>           |                            |
| <i>Escherichia coli</i>        | 29 (64.4)                    | 7 (15.6)                    | 9 (20.0)                     | 45 (100)                     | -                                 | -                          | -                               | -                               | -                          | 45 (46.4)                  |
| <i>Klebsiella pneumoniae</i>   | 2 (66.7)                     | -                           | 1 (33.3)                     | 3 (50.0)                     | 1 (16.7)                          | -                          | -                               | -                               | 2 (33.3)                   | 6 (6.2)                    |
| <i>Klebsiella oxytoca</i>      | -                            | -                           | -                            | -                            | -                                 | 1 (100)                    | -                               | -                               | -                          | 1 (1.0)                    |
| <i>Klebsiella aerogenes</i>    | 1 (50.0)                     | -                           | 1 (50.0)                     | 2 (50.0)                     | 2 (50.0)                          | -                          | -                               | -                               | -                          | 4 (4.1)                    |
| <i>Enterobacter cloacae</i>    | 1 (33.3)                     | 2 (66.7)                    | -                            | 3 (37.5)                     | 5 (62.5)                          | -                          | -                               | -                               | -                          | 8 (8.2)                    |
| <i>Other Enterobacter spp.</i> | -                            | -                           | -                            | -                            | 4 (100)                           | -                          | -                               | -                               | -                          | 4 (4.1)                    |
| <i>Citrobacter freundii</i>    | -                            | -                           | -                            | -                            | 17 (89.5)                         | -                          | -                               | 2 (10.5)                        | -                          | 19 (19.6)                  |
| <i>Citrobacter braakii</i>     | -                            | -                           | -                            | -                            | 4 (100)                           | -                          | -                               | -                               | -                          | 4 (4.1)                    |
| <i>Other Citrobacter spp.</i>  | -                            | -                           | 1 (100)                      | 1 (50.0)                     | 1 (50.0)                          | -                          | -                               | -                               | -                          | 2 (2.1)                    |
| <i>Hafnia alvei</i>            | -                            | -                           | -                            | -                            | 2 (100)                           | -                          | -                               | -                               | -                          | 2 (2.1)                    |
| <i>Serratia marcescens</i>     | -                            | -                           | -                            | -                            | -                                 | -                          | 2 (100)                         | -                               | -                          | 2 (2.1)                    |
| <b>Total (n (%))</b>           | <b>33 (61.1)<sup>3</sup></b> | <b>9 (16.7)<sup>3</sup></b> | <b>12 (22.2)<sup>3</sup></b> | <b>54 (55.7)<sup>4</sup></b> | <b>36 (37.1)<sup>4</sup></b>      | <b>1 (1.0)<sup>4</sup></b> | <b>2 (2.1)<sup>4</sup></b>      | <b>2 (2.1)<sup>4</sup></b>      | <b>2 (2.1)<sup>4</sup></b> | <b>97 (100)</b>            |

<sup>1</sup>Percentage based on all isolates of the named species

<sup>2</sup>Percentage based on total number of ESBL positive isolates of the named species

<sup>3</sup>Percentage based on total number of ESBL positive isolates

<sup>4</sup>Percentage based on all 97 isolated 3GCREB

3GCREB, third-generation cephalosporin-resistant *Enterobacteriales*; ESBL-E, extended-spectrum-beta-lactamase-producing *Enterobacteriales*

**Comparison of stool samples and rectal swabs with and without pre-enrichment for the detection of third-generation cephalosporin-resistant *Enterobacteriales* (3GCREB)**

**European Journal of Clinical Microbiology & Infectious Diseases**

Tarek Jazmati<sup>a,b</sup>, Axel Hamprecht<sup>a,b,d</sup>, Nathalie Jazmati<sup>a,b,c,#</sup>

<sup>a</sup>Institute for Medical Microbiology, Immunology and Hygiene, University of Cologne, Cologne, Germany; <sup>b</sup>German Centre for Infection Research (DZIF), partner site Bonn-Cologne, Germany; <sup>c</sup>Laboratory Dr. Wisplinghoff, Cologne, Germany; <sup>d</sup>Institute for Medical Microbiology and Virology, University of Oldenburg & Klinikum Oldenburg, Oldenburg, Germany

<sup>#</sup>Corresponding author: nathalie.jazmati@uk-koeln.de

**Online Resource 4** Patient characteristics of 3GCREB carriers detected by the four approaches and compared to each other

| Patients characteristics <sup>a</sup> | Overall carrier<br>(n=68) | 3GCREB carrier recovered by                |                                         |                                                  |                                               |
|---------------------------------------|---------------------------|--------------------------------------------|-----------------------------------------|--------------------------------------------------|-----------------------------------------------|
|                                       |                           | Stool without pre-enrichment<br>(A) (n=44) | Stool with pre-enrichment<br>(B) (n=56) | Rectal swab without pre-enrichment<br>(C) (n=42) | Rectal swab with pre-enrichment<br>(D) (n=54) |
| Age (years)                           | 58.9 ± 22.2               | 59.1 ± 22.8                                | 59.8 ± 21.5                             | 56.1 ± 24.4                                      | 56.8 ± 23.4                                   |
| No. Male (%)                          | 40 (58.8%)                | 28 (63.6%)                                 | 33 (58.9%)                              | 26 (61.9%)                                       | 31 (57.4%)                                    |
| Clinical setting (no. (%))            |                           |                                            |                                         |                                                  |                                               |
| Internal Medicine                     | 33 (48.5%)                | 21 (47.7%)                                 | 27 (48.2%)                              | 20 (47.6%)                                       | 28 (51.9%)                                    |
| Surgery                               | 8 (11.8%)                 | 4 (9.1%)                                   | 7 (12.5%)                               | 3 (7.1%)                                         | 5 (9.3%)                                      |
| Intensive Care Unit                   | 13 (19.1%)                | 10 (22.7%)                                 | 12 (21.4%)                              | 8 (19.0%)                                        | 10 (18.5%)                                    |
| Pediatrics                            | 5 (7.4%)                  | 3 (6.8%)                                   | 3 (5.4%)                                | 4 (9.5%)                                         | 5 (9.3%)                                      |
| Others                                | 9 (13.2%)                 | 6 (13.6%)                                  | 7 (12.5%)                               | 7 (16.7%)                                        | 6 (11.1%)                                     |

<sup>a</sup> Calculation is based on a patients level (i.e., patients with more than one positive sample were only included in the calculation once).

\* p-value by  $\chi^2$  test was calculated for 3GCREB carriers detected by the four approaches

3GCREB, third-generation cephalosporin-resistant *Enterobacteriales*

**Comparison of stool samples and rectal swabs with and without pre-enrichment for the detection of third-generation cephalosporin-resistant *Enterobacteriales* (3GCREB)**  
**European Journal of Clinical Microbiology & Infectious Diseases**

Tarek Jazmati<sup>a,b</sup>, Axel Hamprecht<sup>a,b,d</sup>, Nathalie Jazmati<sup>a,b,c,#</sup>

<sup>a</sup>Institute for Medical Microbiology, Immunology and Hygiene, University of Cologne, Cologne, Germany; <sup>b</sup>German Centre for Infection Research (DZIF), partner site Bonn-Cologne, Germany; <sup>c</sup>Laboratory Dr. Wisplinghoff, Cologne, Germany; <sup>d</sup>Institute for Medical Microbiology and Virology, University of Oldenburg & Klinikum Oldenburg, Oldenburg, Germany

<sup>#</sup>Corresponding author: nathalie.jazmati@uk-koeln.de

**Online Resource 5** Patient characteristics of ESBL-E carriers detected by the four approaches and compared to each other

| Patients characteristics <sup>a</sup> | Overall carrier<br>(n=34) | ESBL-E carrier recovered by                |                                         |                                                  |                                               |
|---------------------------------------|---------------------------|--------------------------------------------|-----------------------------------------|--------------------------------------------------|-----------------------------------------------|
|                                       |                           | Stool without pre-enrichment<br>(A) (n=29) | Stool with pre-enrichment<br>(B) (n=31) | Rectal swab without pre-enrichment<br>(C) (n=27) | Rectal swab with pre-enrichment<br>(D) (n=30) |
| Age (years)                           | 59.2 ± 20.1               | 58.9 ± 17.4                                | 58.1 ± 20.7                             | 54.8 ± 20.1                                      | 56.6 ± 19.9                                   |
| No. Male (%)                          | 20 (58.8%)                | 20 (69.0%)                                 | 19 (61.3%)                              | 18 (66.7%)                                       | 18 (60.0%)                                    |
| Clinical setting (no. (%))            |                           |                                            |                                         |                                                  |                                               |
| Internal Medicine                     | 21 (61.8%)                | 18 (62.1%)                                 | 19 (61.3%)                              | 18 (66.7%)                                       | 20 (66.7%)                                    |
| Surgery                               | 3 (8.8%)                  | 2 (6.9%)                                   | 3 (9.7%)                                | 1 (3.7%)                                         | 1 (3.3%)                                      |
| Intensive Care Unit                   | 6 (17.6%)                 | 6 (20.7%)                                  | 5 (16.1%)                               | 4 (14.8%)                                        | 5 (16.7%)                                     |
| Pediatrics                            | 1 (2.9%)                  | 0                                          | 1 (3.2%)                                | 1 (3.7%)                                         | 1 (3.3%)                                      |
| Others                                | 3 (8.8%)                  | 3 (10.3%)                                  | 3 (9.7%)                                | 3 (11.1%)                                        | 3 (10.0%)                                     |

<sup>a</sup> Calculation is based on a patients level (i.e., patients with more than one positive sample were only included in the calculation once).

\* p-value by  $\chi^2$  test was calculated for ESBL-E carriers detected by the four approaches

ESBL-E, extended-spectrum-beta-lactamase-producing *Enterobacteriales*
